# Supplementary material for: Severity and properties of cardiac damage caused by Streptococcus pneumoniae are strain dependent
Source: PubMed Central journal article supplement (PMC6138390; doi:10.1371/journal.pone.0204032), 2018-09-14

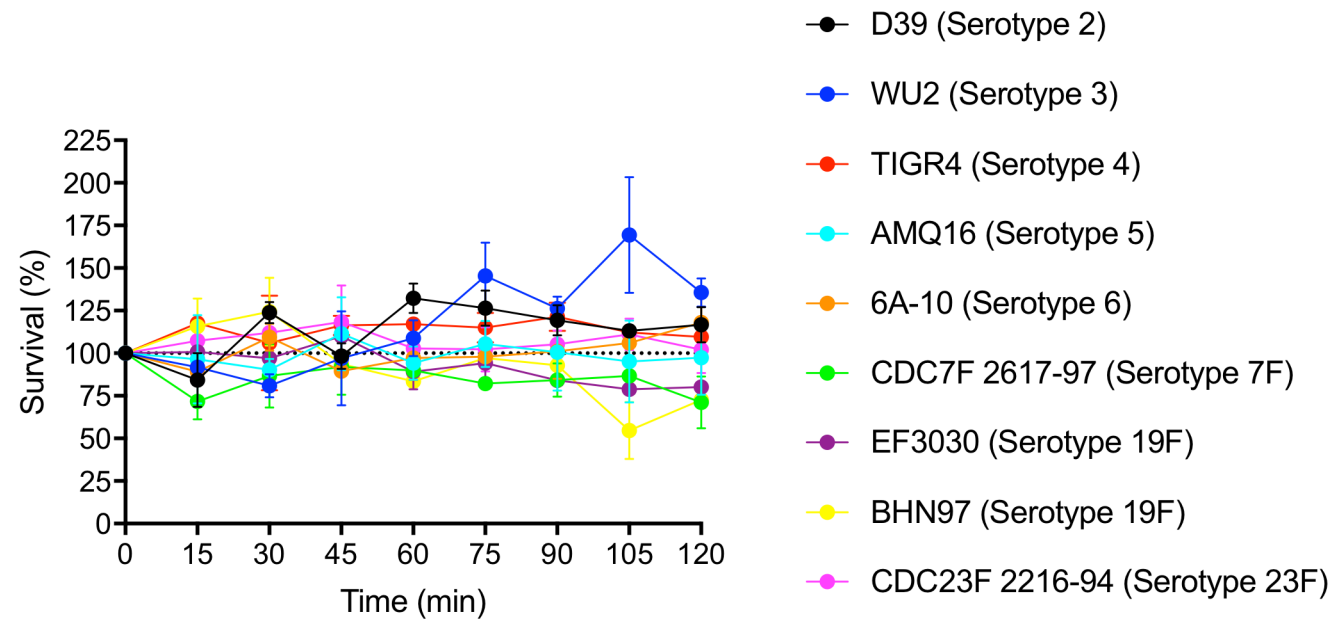

Supplement: pone.0204032.s004.pdf [file pone.0204032.s004.pdf]
