# Supplementary material for: Severity and properties of cardiac damage caused by Streptococcus pneumoniae are strain dependent
Source: PubMed Central journal article supplement (PMC6138390; doi:10.1371/journal.pone.0204032), 2018-09-14
Supplement: pone.0204032.s005.pdf [file pone.0204032.s005.pdf]

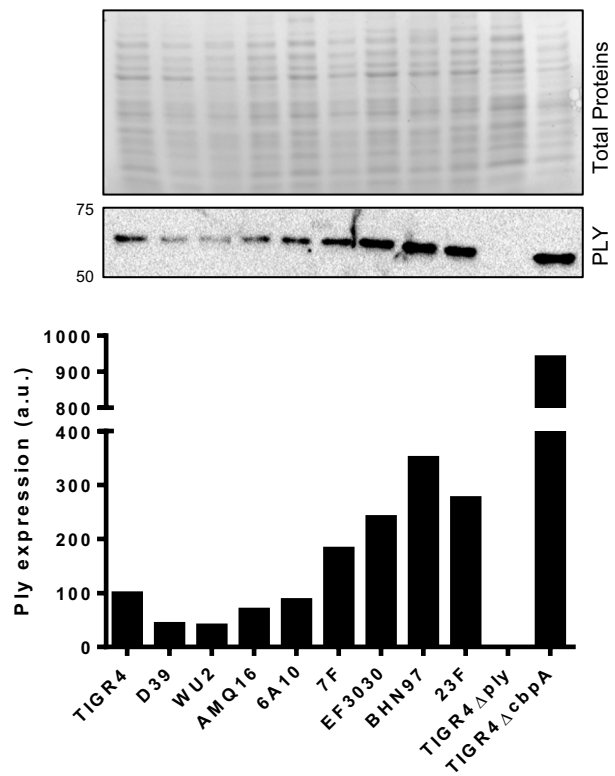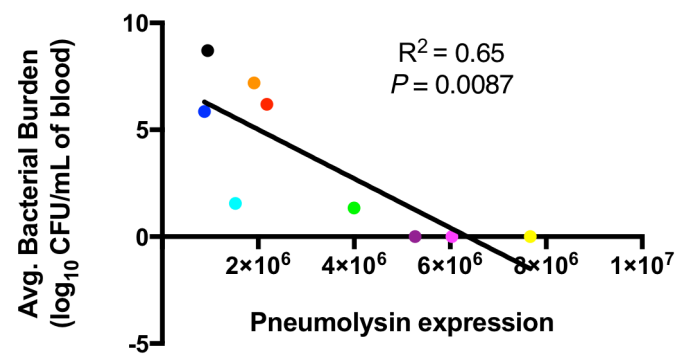

- D39 (Serotype 2)
- WU2 (Serotype 3)
- TIGR4 (Serotype 4)
- AMQ16 (Serotype 5)
- 6A-10 (Serotype 6A)
- CDC7F 2617-97 (Serotype 7F)
- EF3030 (Serotype 19F)
- BHN97 (Serotype 19F)
- CDC23F 2216-94 (Serotype 23F)
